# Supplementary material for: Host Defense Peptides of Thrombin Modulate Inflammation and Coagulation in Endotoxin-Mediated Shock and Pseudomonas aeruginosa Sepsis
Source: PLOS journal article supplement (doi:10.1371/journal.pone.0051313), 2012-12-13
Supplement: S1 (10.1371/journal.pone.0051313.s001) [file journal.pone.0051313.s001]

---

|               | <b>IL-6 (ng/ml)</b> | <b>TNF-<math>\alpha</math> (ng/ml)</b> | <b>MCP-1 (ng/ml)</b> | <b>IFN-<math>\gamma</math> (ng/ml)</b> | <b>IL-10 (ng/ml)</b> |
|---------------|---------------------|----------------------------------------|----------------------|----------------------------------------|----------------------|
| <b>Buffer</b> | 0.0067 $\pm$ 0.0002 | 0.0355 $\pm$ 0.0018                    | 0.0081 $\pm$ 0.003   | 0.0018 $\pm$ 0.001                     | 0.00062 $\pm$ 0.0006 |
| <b>GKY25</b>  | 0.0079 $\pm$ 0.0053 | 0.0029 $\pm$ 0.0010                    | 0.1512 $\pm$ 0.095   | 0.0002 $\pm$ 0.0001                    | 0.0005 $\pm$ 0.0006  |
| <b>HVF18</b>  | 0.0015 $\pm$ 0.0003 | 0.0041 $\pm$ 0.0003                    | 0.0136 $\pm$ 0.003   | 0.0002 $\pm$ 0.0001                    | 0.0042 $\pm$ 0.0006  |

---
